# Supplementary material for: The difference of disease perception by juvenile idiopathic arthritis patients and their parents: analysis of the JAMAR questionnaire
Source: PubMed Central journal article supplement (PMC4702328; doi:10.1186/s12969-015-0063-3), 2016-01-06
Supplement: 12969_2015_63_MOESM3_ESM.pdf [file 12969_2015_63_MOESM3_ESM.pdf]

| Dependent Variable:MD VAS                               |           |           |                       |            |             |                         |             |
|---------------------------------------------------------|-----------|-----------|-----------------------|------------|-------------|-------------------------|-------------|
|                                                         | (I) group | (J) group | Mean Difference (I-J) | Std. Error | Sig.        | 95% Confidence Interval |             |
|                                                         |           |           |                       |            |             | Lower Bound             | Upper Bound |
| Tukey HSD                                               | A         | B         | -1.01                 | 0.5654     | ,480        | -2.655                  | 0.635       |
|                                                         |           | C         | -1.111                | 0.6444     | ,520        | -2.985                  | 0.764       |
|                                                         |           | D         | -1.492                | 0.5599     | ,092        | -3.121                  | 0.137       |
|                                                         |           | E         | -2.617*               | 0.6752     | <b>,003</b> | -4.581                  | -0.652      |
|                                                         |           | F         | -1.932                | 0.8121     | ,174        | -4.295                  | 0.431       |
|                                                         | B         | A         | 1.01                  | 0.5654     | ,480        | -0.635                  | 2.655       |
|                                                         |           | C         | -0.101                | 0.6268     | 1,000       | -1.925                  | 1.723       |
|                                                         |           | D         | -0.482                | 0.5396     | ,947        | -2.052                  | 1.088       |
|                                                         |           | E         | -1.607                | 0.6585     | ,153        | -3.523                  | 0.309       |
|                                                         |           | F         | -0.922                | 0.7982     | ,857        | -3.245                  | 1.4         |
|                                                         | C         | A         | 1.111                 | 0.6444     | ,520        | -0.764                  | 2.985       |
|                                                         |           | B         | 0.101                 | 0.6268     | 1,000       | -1.723                  | 1.925       |
|                                                         |           | D         | -0.381                | 0.6219     | ,990        | -2.19                   | 1.428       |
|                                                         |           | E         | -1.506                | 0.7275     | ,312        | -3.622                  | 0.611       |
|                                                         |           | F         | -0.821                | 0.856      | ,929        | -3.312                  | 1.669       |
|                                                         | D         | A         | 1.492                 | 0.5599     | ,092        | -0.137                  | 3.121       |
|                                                         |           | B         | 0.482                 | 0.5396     | ,947        | -1.088                  | 2.052       |
|                                                         |           | C         | 0.381                 | 0.6219     | ,990        | -1.428                  | 2.19        |
|                                                         |           | E         | -1.125                | 0.6538     | ,522        | -3.027                  | 0.777       |
|                                                         |           | F         | -0.44                 | 0.7944     | ,994        | -2.752                  | 1.871       |
|                                                         | E         | A         | 2.617*                | 0.6752     | <b>,003</b> | 0.652                   | 4.581       |
|                                                         |           | B         | 1.607                 | 0.6585     | ,153        | -0.309                  | 3.523       |
|                                                         |           | C         | 1.506                 | 0.7275     | ,312        | -0.611                  | 3.622       |
|                                                         |           | D         | 1.125                 | 0.6538     | ,522        | -0.777                  | 3.027       |
|                                                         |           | F         | 0.685                 | 0.8795     | ,971        | -1.874                  | 3.243       |
|                                                         | F         | A         | 1.932                 | 0.8121     | ,174        | -0.431                  | 4.295       |
|                                                         |           | B         | 0.922                 | 0.7982     | ,857        | -1.4                    | 3.245       |
|                                                         |           | C         | 0.821                 | 0.856      | ,929        | -1.669                  | 3.312       |
|                                                         |           | D         | 0.44                  | 0.7944     | ,994        | -1.871                  | 2.752       |
|                                                         |           | E         | -0.685                | 0.8795     | ,971        | -3.243                  | 1.874       |
| Based on observed means.                                |           |           |                       |            |             |                         |             |
| The error term is Mean Square(Error) = 3,420.           |           |           |                       |            |             |                         |             |
| *. The mean difference is significant at the ,05 level. |           |           |                       |            |             |                         |             |
