# Supplementary material for: The difference of disease perception by juvenile idiopathic arthritis patients and their parents: analysis of the JAMAR questionnaire
Source: PubMed Central journal article supplement (PMC4702328; doi:10.1186/s12969-015-0063-3), 2016-01-06
Supplement: 12969_2015_63_MOESM4_ESM.pdf [file 12969_2015_63_MOESM4_ESM.pdf]

### Multiple Comparisons

| Dependent Variable: JADAS |           |           |                       |            |             |                         |             |
|---------------------------|-----------|-----------|-----------------------|------------|-------------|-------------------------|-------------|
|                           | (I) group | (J) group | Mean Difference (I-J) | Std. Error | Sig.        | 95% Confidence Interval |             |
|                           |           |           |                       |            |             | Lower Bound             | Upper Bound |
| Tukey HSD                 | A         | B         | -1.962                | 1.3765     | ,712        | -5.967                  | 2.043       |
|                           |           | C         | -4.283                | 1.5689     | ,079        | -8.847                  | 0.282       |
|                           |           | D         | -4.444*               | 1.3631     | <b>,019</b> | -8.41                   | -0.478      |
|                           |           | E         | -6.748*               | 1.644      | <b>,001</b> | -11.531                 | -1.965      |
|                           |           | F         | -6.240*               | 1.9772     | <b>,025</b> | -11.992                 | -0.488      |
|                           | B         | A         | 1.962                 | 1.3765     | ,712        | -2.043                  | 5.967       |
|                           |           | C         | -2.321                | 1.5262     | ,652        | -6.761                  | 2.119       |
|                           |           | D         | -2.482                | 1.3137     | ,415        | -6.305                  | 1.34        |
|                           |           | E         | -4.787*               | 1.6033     | <b>,041</b> | -9.451                  | -0.122      |
|                           |           | F         | -4.278                | 1.9435     | ,247        | -9.933                  | 1.376       |
|                           | C         | A         | 4.283                 | 1.5689     | ,079        | -0.282                  | 8.847       |
|                           |           | B         | 2.321                 | 1.5262     | ,652        | -2.119                  | 6.761       |
|                           |           | D         | -0.161                | 1.5141     | 1,000       | -4.566                  | 4.244       |
|                           |           | E         | -2.465                | 1.7712     | ,732        | -7.618                  | 2.688       |
|                           |           | F         | -1.957                | 2.0841     | ,935        | -8.021                  | 4.106       |
|                           | D         | A         | 4.444*                | 1.3631     | <b>,019</b> | 0.478                   | 8.41        |
|                           |           | B         | 2.482                 | 1.3137     | ,415        | -1.34                   | 6.305       |
|                           |           | C         | 0.161                 | 1.5141     | 1,000       | -4.244                  | 4.566       |
|                           |           | E         | -2.304                | 1.5918     | ,698        | -6.935                  | 2.327       |
|                           |           | F         | -1.796                | 1.934      | ,938        | -7.423                  | 3.831       |
|                           | E         | A         | 6.748*                | 1.644      | <b>,001</b> | 1.965                   | 11.531      |
|                           |           | B         | 4.787*                | 1.6033     | <b>,041</b> | 0.122                   | 9.451       |
|                           |           | C         | 2.465                 | 1.7712     | ,732        | -2.688                  | 7.618       |
|                           |           | D         | 2.304                 | 1.5918     | ,698        | -2.327                  | 6.935       |
|                           |           | F         | 0.508                 | 2.1413     | 1,000       | -5.721                  | 6.738       |
|                           | F         | A         | 6.240*                | 1.9772     | <b>,025</b> | 0.488                   | 11.992      |
|                           |           | B         | 4.278                 | 1.9435     | ,247        | -1.376                  | 9.933       |
|                           |           | C         | 1.957                 | 2.0841     | ,935        | -4.106                  | 8.021       |
|                           |           | D         | 1.796                 | 1.934      | ,938        | -3.831                  | 7.423       |
|                           |           | E         | -0.508                | 2.1413     | 1,000       | -6.738                  | 5.721       |

Based on observed means.

The error term is Mean Square(Error) = 3,420.

\*. The mean difference is significant at the ,05 level.
