# Supplementary material for: The difference of disease perception by juvenile idiopathic arthritis patients and their parents: analysis of the JAMAR questionnaire
Source: Springer Nature journal article supplement (doi:10.1186/s12969-015-0063-3), 2016-01-05

### Age at visit (mean years)

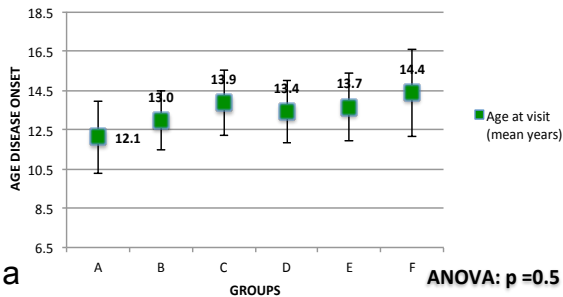

### Age disease onset (mean years)

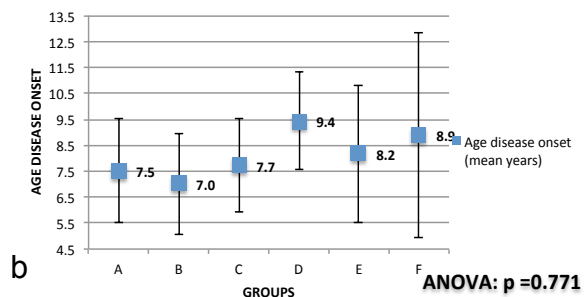

### Disease duration(mean years)

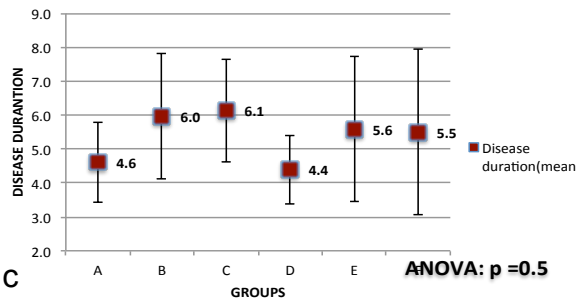

### N°Active joints (mean)

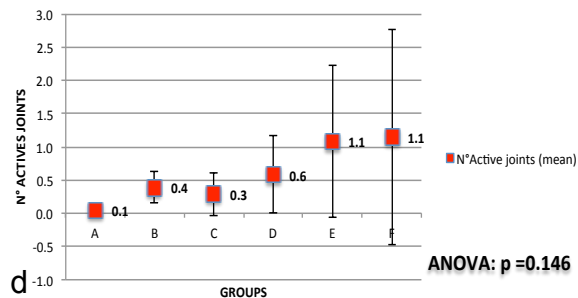

Supplement: MOESM1 [file 9768010]
