# Supplementary material for: The difference of disease perception by juvenile idiopathic arthritis patients and their parents: analysis of the JAMAR questionnaire
Source: Springer Nature journal article supplement (doi:10.1186/s12969-015-0063-3), 2016-01-05
Supplement: MOESM2 [file 9768010]

|         | Number of pairs | Age disease onset (years) | Age at visit (years) | Disease duration (years) | N°Active joints | MD global VAS | JADAS |
|---------|-----------------|---------------------------|----------------------|--------------------------|-----------------|---------------|-------|
| Group A | 20              | 7.5                       | 12.1                 | 4.6                      | 0.1             | 0.4           | 1.8   |
| Group B | 23              | 7.0                       | 13.0                 | 6.0                      | 0.4             | 1.4           | 3.7   |
| Group C | 14              | 7.7                       | 13.9                 | 6.1                      | 0.3             | 1.5           | 6.0   |
| Group B | 24              | 9.4                       | 13.4                 | 4.4                      | 0.6             | 1.9           | 6.2   |
| Group E | 12              | 8.2                       | 13.7                 | 5.6                      | 1.1             | 3.0           | 8.5   |
| Group F | 7               | 8.9                       | 14.4                 | 5.5                      | 1.1             | 2.4           | 8.0   |
